# Supplementary material for: Association Between Various Dosage Forms of Semaglutide and Ocular Adverse Events in a Real-World Setting
Source: Research Square preprint supplement (doi:10.21203/rs.3.rs-5868396/v1), 2025-04-02
Supplement: Supplementary file 1 [file c2d792126ecabba855f390be.docx]

**Supplementary Material**

Title：Association Between Various Dosage Forms of Semaglutide and Ocular Adverse Events in a Real-World Setting

Tao Zhao. Liting Zheng. Yiyun Feng. Min Lao. Yongmei Huang. Guosong Wuo

1. Zhao, L. Zheng, Y. Feng, M. Lao

Address/Institution: Baiyun Branch, Nanfang Hospital, Southern Medical University and Guangzhou Baiyun District People's Hospitalanf, Guangdong, 510599, Guangzhou, China

W. Song

Baiyun Branch, Nanfang Hospital, Southern Medical University; Guangzhou Baiyun District People's Hospitalanf and Taihe Branch of Nanfang Hospital, Guangdong, 510599, Guangzhou, China

email: [13570254292@163.com](mailto:13570254292@163.com);

Y. Huang

Address/Institution: Baiyun Branch, Nanfang Hospital, Southern Medical University and Guangzhou Baiyun District People's Hospitalanf, Guangdong, 510599, Guangzhou, China

email: [425008225@qq.com](mailto:425008225@qq.com)

**Table S-1** Disproportionality analysis

| **Methods** | **Formula** | **Signal standard** |
| --- | --- | --- |
| ROR | ROR=ad/bc  SElnROR=(1/a+1/b+1/c+1/d)0.5  ROR 95%CI=eln(ROR)±1.96(1/a+1/b+1/c+1/d)0.5 | a≥3  95%CI (lower limit)> 1 |
| PRR/NHRA | PRR=a(c+d)/[c(a+b)]  SElnPRR=(1/a-1/(a+b)+1/c-1/(c+d))0.5  PRR 95%CI=eln(PRR)±1.96(1/a-1/(a+b)+1/c-1/(c+d))0.5  X2=(ad-bc)2(a+b+c+d)/[(a+b)(a+c)(c+d)(b+d)] | a≥3  lower limit of PRR 95%CI > 1 |
| BCPNN | IC=log2[a(a+b+c+d)]/[(a+b)(a+c)]  γ=γij [(N+α) (N+β)]/[(a+b+αi) (a+c+βj)]  E (IC)=log2 [(a+γij) (N+α) (N+β)]/[(N+γ) (a+b+αi) (a+c+βj)]  V(IC)=(log2)−2{(N-a+γ-γij)/[(a+γij) (1+N+γ)] +  (N-a-b+α-αi)/[(a+b+αi) (1 + N+α)] +(N-a-c+β-βi)/[(a+b+βi) (1+N+β)]}  SD= 2(V(IC))0.5  IC-2SD = E (IC)-2SD | a≥3  IC-2SD > 0 |
| MGPS | EBGM=a(a+b+c+d)/[(a+c)(b+d)]  EBGM 95%CI =eln(EBGM)±1.96(1/a+1/b+1/c+1/d)0.5 | a>0  EBGM05 > 2 |

Note: γ and γij are parameters of the binomial distribution; αi, α, βj, and β are parameters of the Beta distribution; SD stands for Standard Deviation; IC-2SD is the lower limit of the Information Component, representing the 95% Confidence Interval; EBGM05 refers to the lower limit of the Empirical Bayesian Geometric Mean, also within the 95% Confidence Interval; 95% CI signifies the 95% Confidence Interval.

**Table S-2** The top 30 PTs with the highest positive signal intensity of target drugs

| Dosage form | PTs | Case | ROR (95％CI) |
| --- | --- | --- | --- |
| Subcutaneous | Diabetic retinopathy | 76 | 18.31(14.58-23.00) |
| Retinopathy | 56 | 11.93(9.16-15.54) |
| Optic ischaemic neuropathy | 30 | 9.15(6.38-13.12) |
| Diabetic eye disease | 4 | 7.84(2.93-21.01) |
| Diabetic retinal oedema | 4 | 6.42(2.40-17.18) |
| Vitreous haemorrhage | 19 | 5.55(3.53-8.71) |
| Retinal tear | 13 | 4.39(2.54-7.57) |
| Vitreous detachment | 10 | 3.80(2.04-7.07) |
| Macular hole | 6 | 3.61(1.62-8.06) |
| Neovascular age-related macular degeneration | 5 | 3.30(1.37-7.93) |
| Dark circles under eyes | 5 | 2.69(1.12-6.46) |
| Vision blurred | 433 | 2.58(2.35-2.84) |
| Visual impairment | 392 | 2.51(2.27-2.78) |
| Vitreous floaters | 23 | 1.95(1.29-2.93) |
| Eye haemorrhage | 31 | 1.83(1.28-2.60) |
| Retinal detachment | 20 | 1.79(1.15-2.77) |
| Blindness unilateral | 30 | 1.72(1.20-2.46) |
| Blindness | 69 | 1.39(1.10-1.76) |
| Cataract | 98 | 1.37(1.12-1.67) |
| Oral | Diabetic retinopathy | 8 | 18.99(9.49-38.02) |
| Vitreous haemorrhage | 4 | 11.70(4.39-31.21) |
| Vision blurred | 69 | 4.15(3.27-5.25) |
| Eye haemorrhage | 6 | 3.55(1.60-7.92) |
| Blindness unilateral | 5 | 2.88(1.20-6.93) |
| Visual impairment | 38 | 2.45(1.78-3.37) |
| Blindness | 10 | 2.03(1.09-3.78) |
